# Supplementary material
Source: publisher site journal article supplement (https://www.dovepress.com/article/377372)

**Supplementary materials**

**Figure S1:** The relationship between age and other variables (including ESS, AHI, sleep efficiency and depression) was detected in NT1 patients using GAM and smooth curve fitting.


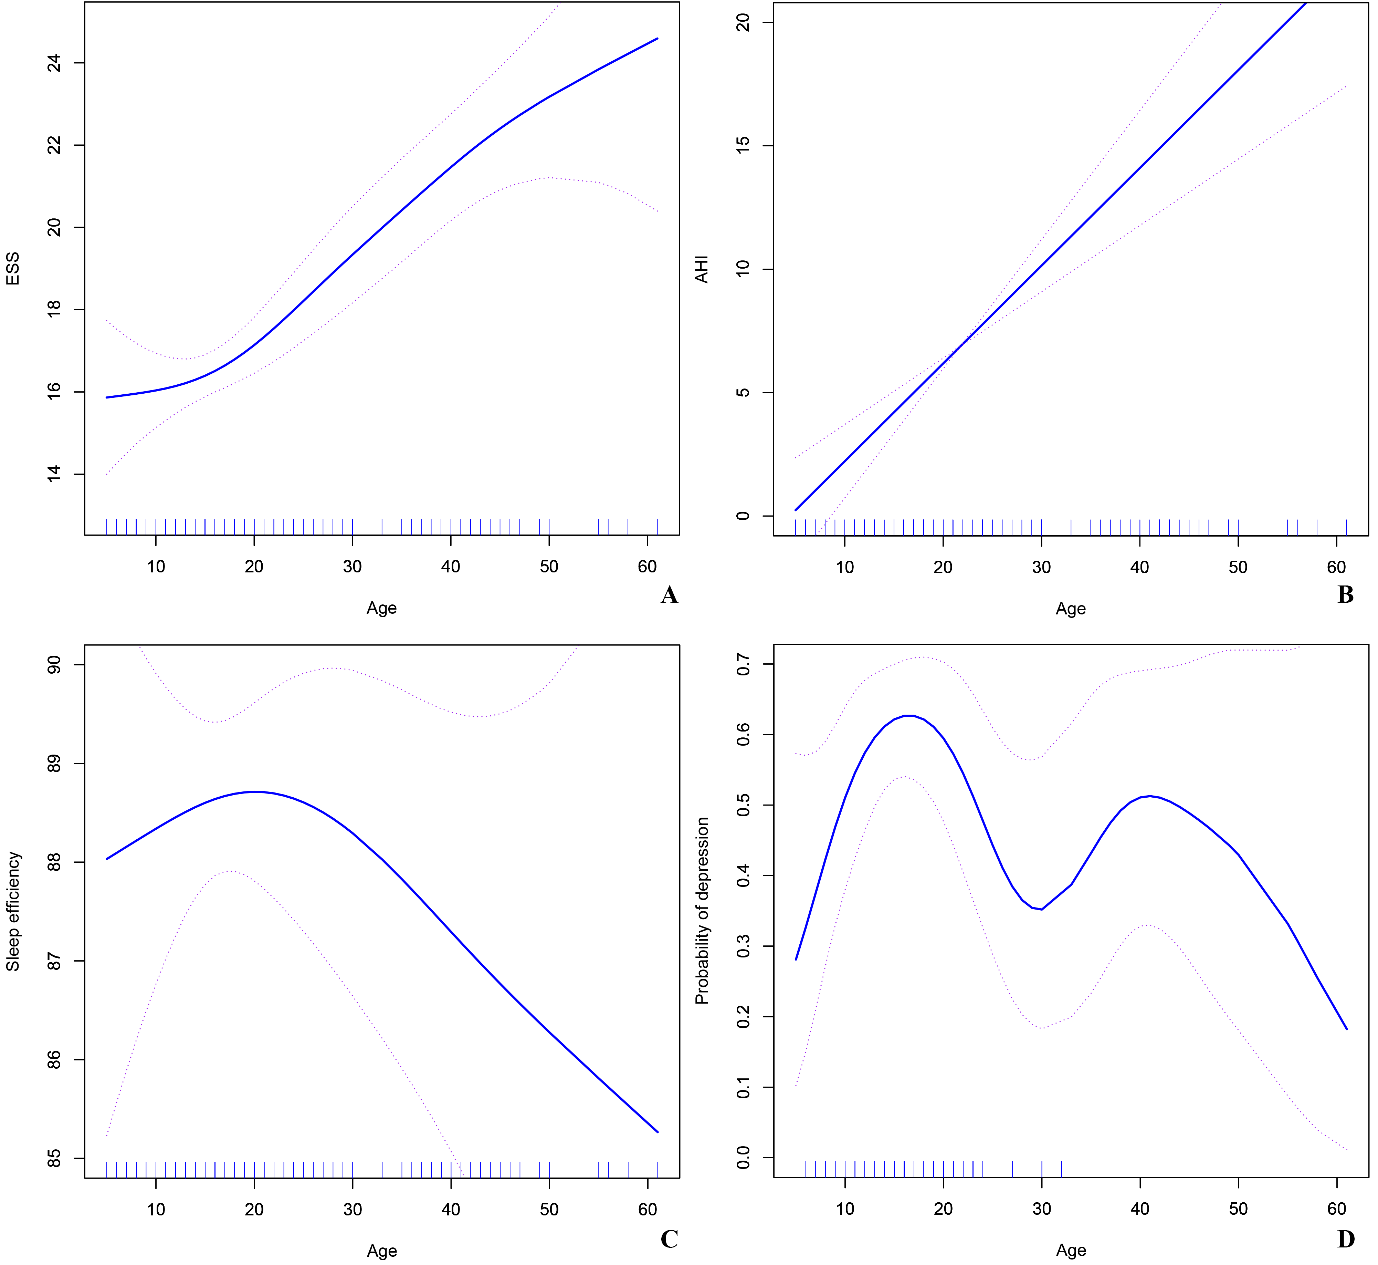


**Figure S2:** The density curve distribution of onset-age for NT1 patients in this study.
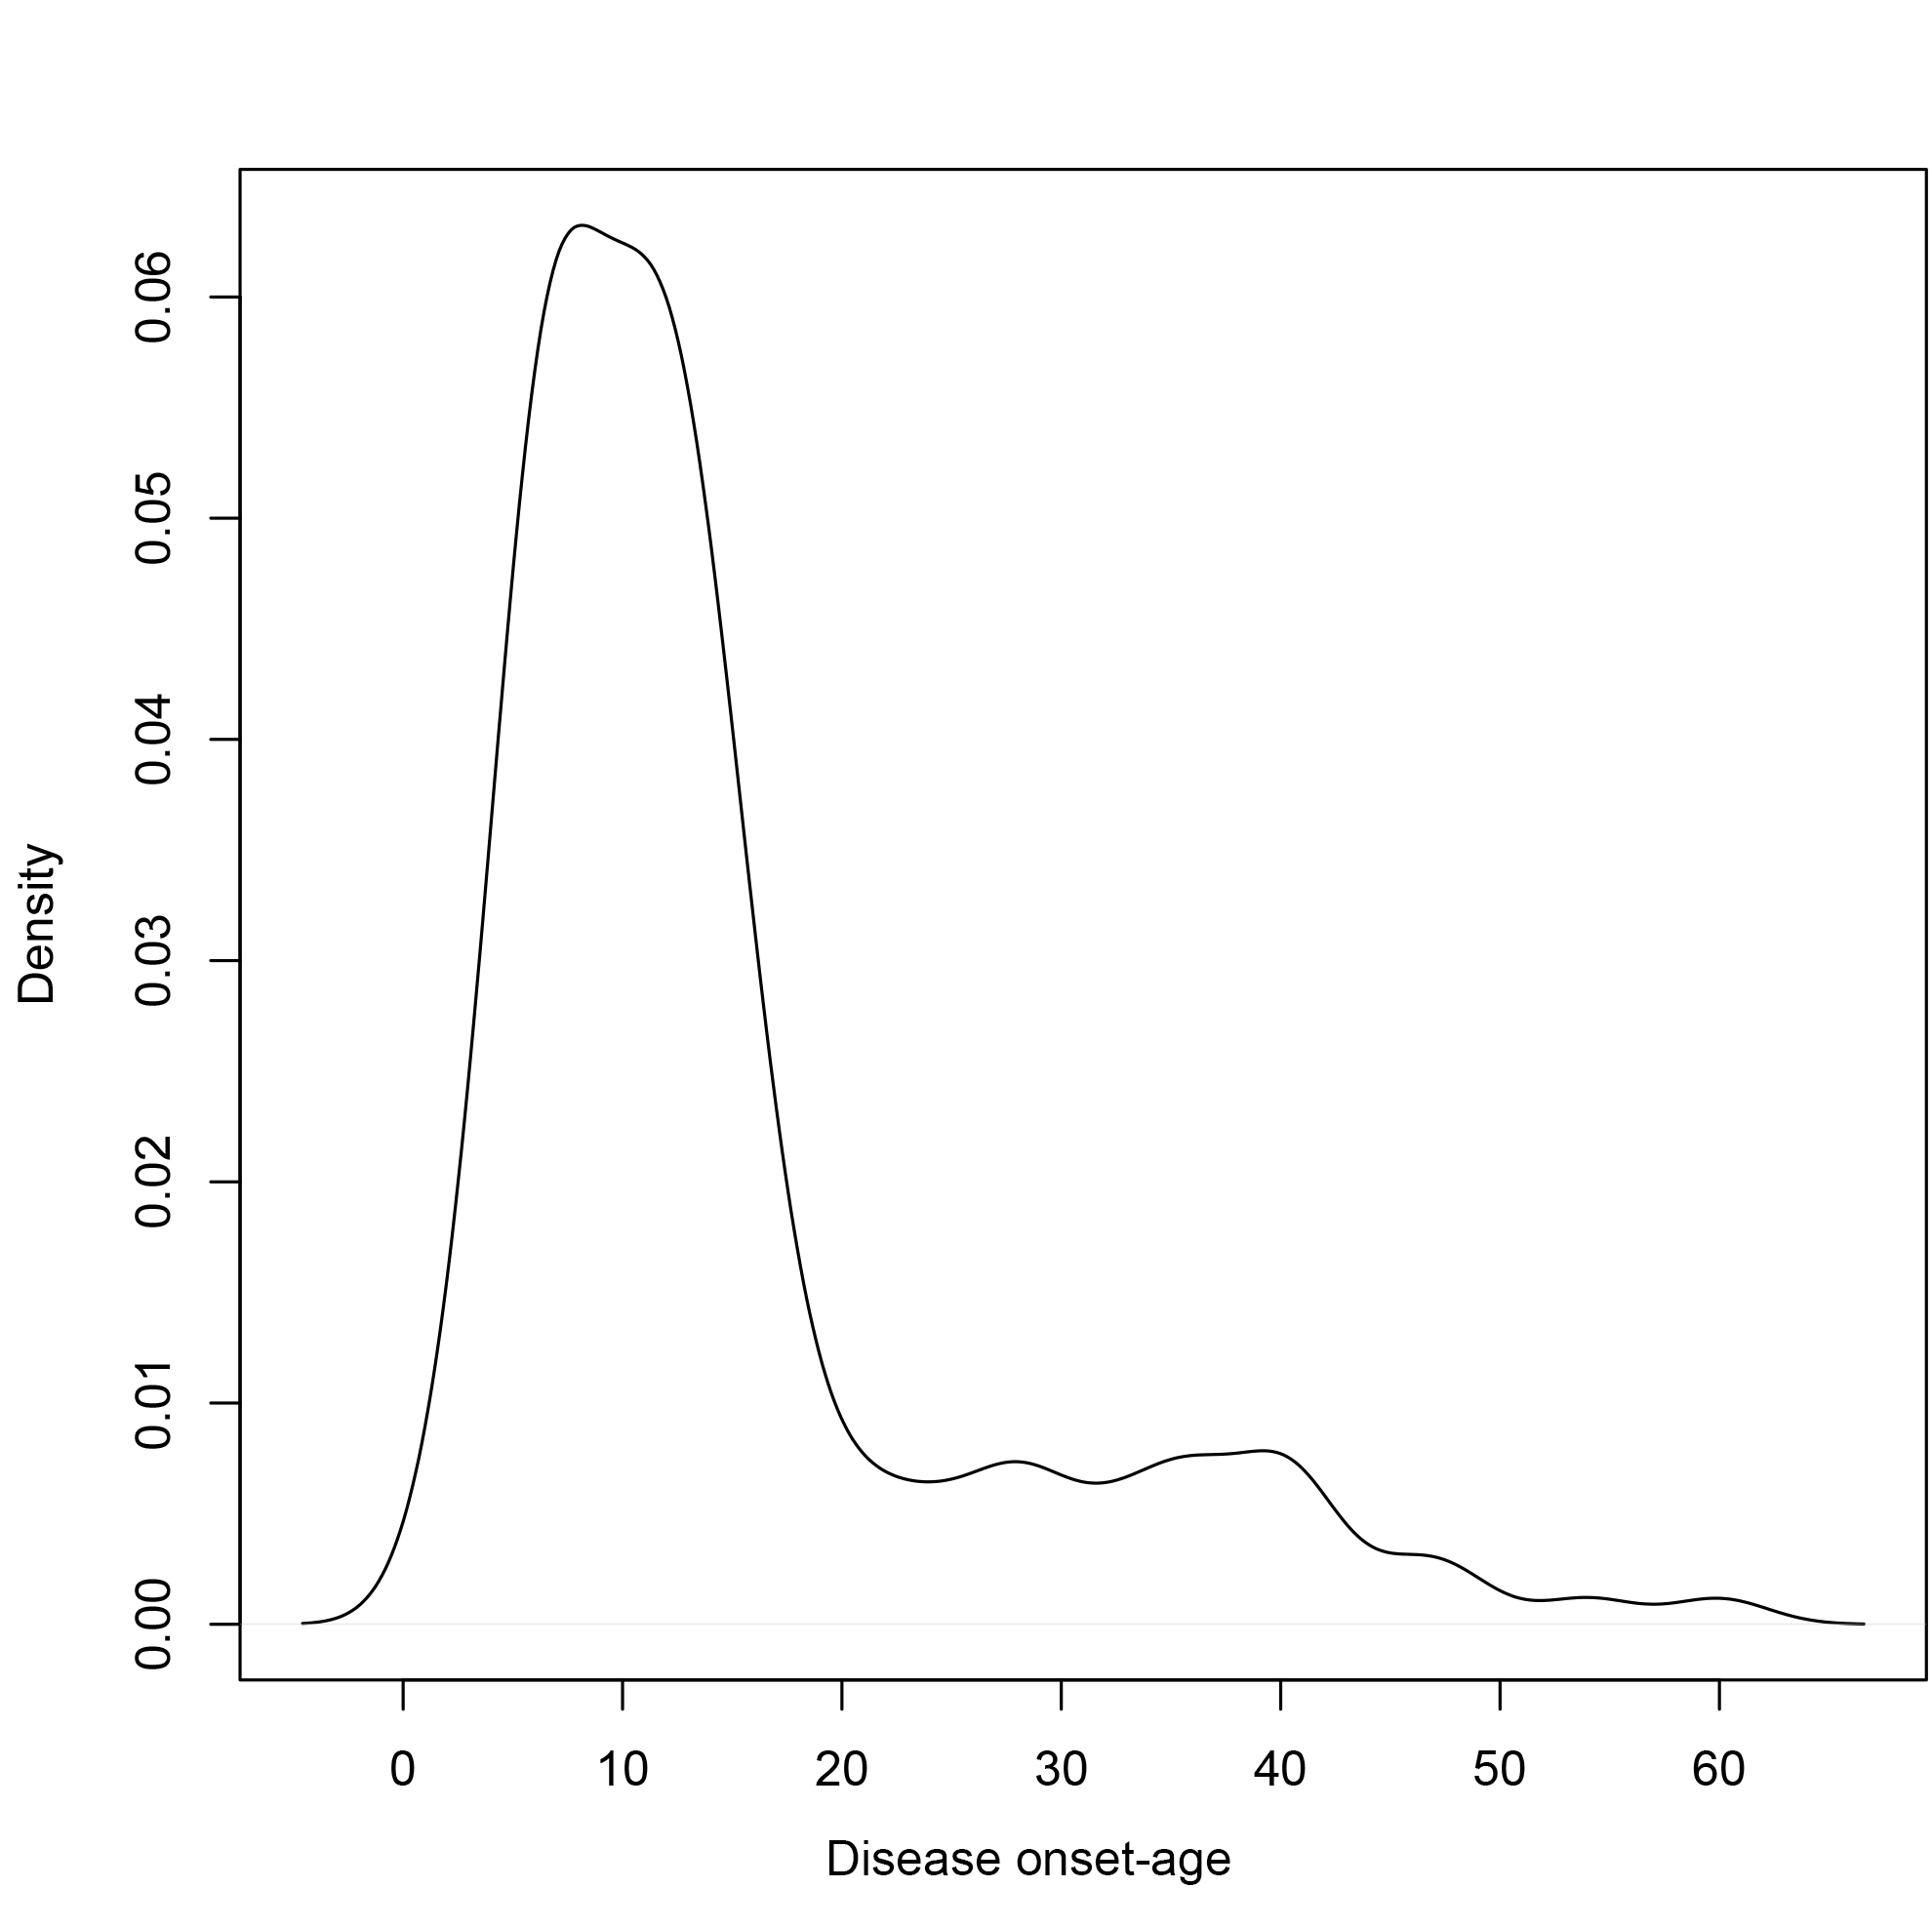

Supplement: Supplementary file 1 [file get_supplementary_file.php]
